# Supplementary material for: Prostate Cancer Screening Uptake in Transgender Women
Source: PubMed Central journal article supplement (PMC10867675; doi:10.1001/jamanetworkopen.2023.56088), 2024-02-14
Supplement: jamanetwopen-e2356088-s001.pdf [file jamanetwopen-e2356088-s001.pdf]

## Supplementary Online Content

Kalavacherla S, Riviere P, Kalavacherla S, Anger JT, Murphy JD, Rose BS. Title. *JAMA Netw Open*. 2024;7(2):e2356088. doi:10.1001/jamanetworkopen.2023.56088

**eTable 1.** Distribution of States From Which Participants Answered Prostate Cancer-Specific Questions Used in This Analysis

**eTable 2.** Final Multivariable Model in Matched Cohort After All Variables in Hierarchical Logistic Regression Analysis Were Added

**eTable 3.** Hierarchical Logistic Regression Analysis Using Unweighted Survey Data

**eTable 4.** Multivariable Logistic Regression in All Transgender Women Using Unweighted Survey Data

This supplementary material has been provided by the authors to give readers additional information about their work.

**eTable 1.** Distribution of States From Which Participants Answered Prostate Cancer-Specific Questions

Used in This Analysis

| States               | Full cohort, N =<br>139,250 <sup>1</sup> | All TF, N =<br>313 <sup>1</sup> | Matched cohort, N =<br>1,275 <sup>1</sup> | Matched TF,<br>N = 255 <sup>1</sup> |
|----------------------|------------------------------------------|---------------------------------|-------------------------------------------|-------------------------------------|
| Alabama              | 0 (0%)                                   | 0 (0%)                          | 0 (0%)                                    | 0 (0%)                              |
| Alaska               | 1,100 (0.8%)                             | 3 (1.0%)                        | 6 (0.5%)                                  | 3 (1.2%)                            |
| Arizona              | 0 (0%)                                   | 0 (0%)                          | 0 (0%)                                    | 0 (0%)                              |
| Arkansas             | 1,394 (1.0%)                             | 3 (1.0%)                        | 4 (0.3%)                                  | 3 (1.2%)                            |
| California           | 997 (0.7%)                               | 3 (1.0%)                        | 3 (0.2%)                                  | 2 (0.8%)                            |
| Colorado             | 2,765 (2.0%)                             | 1 (0.3%)                        | 2 (0.2%)                                  | 1 (0.4%)                            |
| Connecticut          | 5,562 (4.0%)                             | 12 (3.8%)                       | 13 (1.0%)                                 | 7 (2.7%)                            |
| Delaware             | 1,282 (0.9%)                             | 5 (1.6%)                        | 5 (0.4%)                                  | 2 (0.8%)                            |
| District of Columbia | 0 (0%)                                   | 0 (0%)                          | 0 (0%)                                    | 0 (0%)                              |
| Florida              | 3,894 (2.8%)                             | 19 (6.1%)                       | 24 (1.9%)                                 | 18 (7.1%)                           |
| Georgia              | 2,257 (1.6%)                             | 6 (1.9%)                        | 8 (0.6%)                                  | 6 (2.4%)                            |
| Hawaii               | 4,640 (3.3%)                             | 20 (6.4%)                       | 38 (3.0%)                                 | 15 (5.9%)                           |
| Idaho                | 2,661 (1.9%)                             | 4 (1.3%)                        | 5 (0.4%)                                  | 3 (1.2%)                            |
| Illinois             | 2,344 (1.7%)                             | 4 (1.3%)                        | 6 (0.5%)                                  | 4 (1.6%)                            |
| Indiana              | 2,189 (1.6%)                             | 4 (1.3%)                        | 3 (0.2%)                                  | 3 (1.2%)                            |
| Iowa                 | 2,769 (2.0%)                             | 7 (2.2%)                        | 7 (0.5%)                                  | 7 (2.7%)                            |
| Kansas               | 5,914 (4.2%)                             | 9 (2.9%)                        | 10 (0.8%)                                 | 9 (3.5%)                            |
| Kentucky             | 0 (0%)                                   | 0 (0%)                          | 0 (0%)                                    | 0 (0%)                              |
| Louisiana            | 2,534 (1.8%)                             | 8 (2.6%)                        | 12 (0.9%)                                 | 6 (2.4%)                            |
| Maine                | 0 (0%)                                   | 0 (0%)                          | 0 (0%)                                    | 0 (0%)                              |
| Maryland             | 5,094 (3.7%)                             | 8 (2.6%)                        | 10 (0.8%)                                 | 7 (2.7%)                            |
| Massachusetts        | 1,565 (1.1%)                             | 1 (0.3%)                        | 2 (0.2%)                                  | 1 (0.4%)                            |
| Michigan             | 1,836 (1.3%)                             | 3 (1.0%)                        | 5 (0.4%)                                  | 3 (1.2%)                            |
| Minnesota            | 9,241 (6.6%)                             | 33 (11%)                        | 37 (2.9%)                                 | 27 (11%)                            |
| Mississippi          | 1,581 (1.1%)                             | 2 (0.6%)                        | 8 (0.6%)                                  | 2 (0.8%)                            |
| Missouri             | 1,572 (1.1%)                             | 1 (0.3%)                        | 5 (0.4%)                                  | 1 (0.4%)                            |
| Montana              | 3,432 (2.5%)                             | 4 (1.3%)                        | 9 (0.7%)                                  | 4 (1.6%)                            |
| Nebraska             | 0 (0%)                                   | 0 (0%)                          | 0 (0%)                                    | 0 (0%)                              |
| Nevada               | 863 (0.6%)                               | 0 (0%)                          | 0 (0%)                                    | 0 (0%)                              |
| New Hampshire        | 0 (0%)                                   | 0 (0%)                          | 0 (0%)                                    | 0 (0%)                              |
| New Jersey           | 2,845 (2.0%)                             | 12 (3.8%)                       | 12 (0.9%)                                 | 7 (2.7%)                            |
| New Mexico           | 1,874 (1.3%)                             | 5 (1.6%)                        | 10 (0.8%)                                 | 5 (2.0%)                            |
| New York             | 13,587 (9.8%)                            | 38 (12%)                        | 55 (4.3%)                                 | 29 (11%)                            |
| North Carolina       | 2,463 (1.8%)                             | 3 (1.0%)                        | 10 (0.8%)                                 | 1 (0.4%)                            |
| North Dakota         | 0 (0%)                                   | 0 (0%)                          | 0 (0%)                                    | 0 (0%)                              |

|                |              |           |           |           |
|----------------|--------------|-----------|-----------|-----------|
| Ohio           | 7,280 (5.2%) | 15 (4.8%) | 32 (2.5%) | 13 (5.1%) |
| Oklahoma       | 2,613 (1.9%) | 2 (0.6%)  | 14 (1.1%) | 2 (0.8%)  |
| Oregon         | 0 (0%)       | 0 (0%)    | 0 (0%)    | 0 (0%)    |
| Pennsylvania   | 1,586 (1.1%) | 4 (1.3%)  | 4 (0.3%)  | 2 (0.8%)  |
| Rhode Island   | 3,019 (2.2%) | 2 (0.6%)  | 11 (0.9%) | 2 (0.8%)  |
| South Carolina | 3,882 (2.8%) | 10 (3.2%) | 24 (1.9%) | 6 (2.4%)  |
| South Dakota   | 0 (0%)       | 0 (0%)    | 0 (0%)    | 0 (0%)    |
| Tennessee      | 1,281 (0.9%) | 3 (1.0%)  | 12 (0.9%) | 3 (1.2%)  |
| Texas          | 5,160 (3.7%) | 6 (1.9%)  | 37 (2.9%) | 4 (1.6%)  |
| Utah           | 2,861 (2.1%) | 4 (1.3%)  | 7 (0.5%)  | 4 (1.6%)  |
| Vermont        | 3,880 (2.8%) | 7 (2.2%)  | 17 (1.3%) | 6 (2.4%)  |
| Virginia       | 5,104 (3.7%) | 7 (2.2%)  | 63 (4.9%) | 6 (2.4%)  |
| Washington     | 7,298 (5.2%) | 15 (4.8%) | 79 (6.2%) | 13 (5.1%) |
| West Virginia  | 3,238 (2.3%) | 10 (3.2%) | 162 (13%) | 9 (3.5%)  |
| Wisconsin      | 2,842 (2.0%) | 9 (2.9%)  | 428 (34%) | 8 (3.1%)  |
| Wyoming        | 0 (0%)       | 0 (0%)    | 0 (0%)    | 0 (0%)    |
| Guam           | 951 (0.7%)   | 1 (0.3%)  | 76 (6.0%) | 1 (0.4%)  |
| Puerto Rico    | 0 (0%)       | 0 (0%)    | 0 (0%)    | 0 (0%)    |

<sup>1</sup> n (%)

**eTable 2.** Final Multivariable Model in Matched Cohort After All Variables in Hierarchical Logistic Regression Analysis Were Added

| <b>Characteristic</b>                                               | <b>OR<sup>1</sup></b> | <b>95% CI<sup>1</sup></b> | <b>p-value</b> |
|---------------------------------------------------------------------|-----------------------|---------------------------|----------------|
| <b>TF</b> (ref: CM)                                                 | 0.87                  | 0.47, 1.31                | 0.3            |
| <b>Last primary care visit</b> (ref: past year)                     |                       |                           |                |
| Past 1-2 years                                                      | 0.39                  | 0.17, 0.90                | 0.27           |
| Past 2-5 years                                                      | 0.34                  | 0.09, 1.25                | 0.1            |
| Over 5 years                                                        | 0.52                  | 0.15, 1.79                | 0.3            |
| <b>Had a provider recommendation for a PSA test</b> (ref: No)       |                       |                           |                |
| Yes                                                                 | 14.1                  | 7.95, 25.0                | <0.001         |
| <b>Had a provider-led discussion of PSA advantages</b> (ref: No)    |                       |                           |                |
| Yes                                                                 | 3.14                  | 1.75, 5.66                | <0.001         |
| <b>Had a provider-led discussion of PSA disadvantages</b> (ref: No) |                       |                           |                |
| Yes                                                                 | 1.16                  | 0.75, 1.80                | 0.5            |

<sup>1</sup> OR = Odds Ratio, CI = Confidence Interval

**eTable 3.** Hierarchical Logistic Regression Analysis Using Unweighted Survey Data

**Legend:** This hierarchical logistic regression analysis measures the effect of gender identify (reference: cisgender) on the odds recent PSA screening in the full matched cohort of transgender females and cisgender males, which included 255 TF and 1,020 CM. Variables were sequentially added into a multivariable logistic regression model while evaluating changes in the odds ratio and p value of the primary independent variable of gender identity. Abbreviations: PSA = prostate-specific antigen.

| <b>Variables</b>                              | <b>Effect of gender identity (reference: cisgender) on recent PSA screening (Odds ratio [95% confidence interval])</b> |
|-----------------------------------------------|------------------------------------------------------------------------------------------------------------------------|
| Gender identity only                          | 0.65 [0.43-0.96], p = 0.02                                                                                             |
| + Time since last check up                    | 0.61 [0.40-0.93], p=0.01                                                                                               |
| + Provider recommendation for a PSA test      | 0.83 [0.63-1.24], p=0.22                                                                                               |
| + Discussed PSA advantages with a provider    | 0.87 [0.41-1.36], p=0.21                                                                                               |
| + Discussed PSA disadvantages with a provider |                                                                                                                        |

**eTable 4.** Multivariable Logistic Regression in All Transgender Women Using Unweighted Survey Data

**Legend:** This multivariable logistic regression model assesses the effects of the following sociodemographic and access to care variables on the odds of recent PSA screening in cohort of TF patients from the matched cohort (N=255). Abbreviations: ref=reference; USD = United States dollars, HS= high school; GED = general equivalency diploma, PSA=prostate-specific antigen

| <b>Characteristic</b>                    | <b>OR<sup>1</sup></b> | <b>95% CI<sup>1</sup></b> | <b>p-value</b> |
|------------------------------------------|-----------------------|---------------------------|----------------|
| <b>Age group (ref: 55-69)</b>            |                       |                           |                |
| < 55                                     | 0.65                  | 0.25, 1.69                | 0.40           |
| ≥ 70                                     | 1.2                   | 1.06, 4.55                | <0.001         |
| <b>Race (ref: White (Non-Hispanic))</b>  |                       |                           |                |
| Asian (Non-Hispanic)                     | 2.97                  | 0.56, 15.7                | 0.22           |
| Black (Non-Hispanic)                     | 2.11                  | 0.74, 6.05                | 0.24           |
| Hispanic                                 | 2.23                  | 0.43, 11.5                | 0.32           |
| Native American (Non-Hispanic)           | 0.22                  | 0.03, 1.44                | 0.11           |
| Other (Non-Hispanic)                     | 0.62                  | 0.07, 5.14                | 0.70           |
| <b>Income (thousand USD) (ref: 0-25)</b> |                       |                           |                |
| 25k-50k                                  | 0.76                  | 0.24, 2.42                | 0.63           |

<sup>1</sup> OR = Odds Ratio, CI = Confidence Interval
