# Supplementary material for: Prostate Cancer Screening Uptake in Transgender Women
Source: PubMed Central journal article supplement (PMC10867675; doi:10.1001/jamanetworkopen.2023.56088), 2024-02-14
Supplement: jamanetwopen-e2356088-s002.pdf [file jamanetwopen-e2356088-s002.pdf]

## Data Sharing Statement

Kalavacherla. Prostate Cancer Screening Uptake in Transgender Women. *JAMA Netw Open*. Published February 14, 2024. doi:10.1001/jamanetworkopen.2023.56088

### Data

**Data available:** Yes

**Data types:** Deidentified participant data

**How to access data:** [https://www.cdc.gov/brfss/data\\_documentation/index.htm](https://www.cdc.gov/brfss/data_documentation/index.htm)

**When available:** With publication

### Supporting Documents

**Document types:** None

### Additional Information

**Who can access the data:** Public

**Types of analyses:** For any purpose

**Mechanisms of data availability:** Publicly available for anyone to access, without investigator support
